# 1 A Hybrid Catheter Localisation Framework in 2 Echocardiography Based on Electromagnetic Tracking 3 and Deep Learning Segmentation

4 Fei Jia<sup>1,‡</sup>, Shu Wang<sup>2,‡</sup>, V. T. Pham<sup>3,\*</sup>

5 <sup>1</sup> Faculty of Natural, Mathematical & Engineering Sciences, King's College London, London, UK

6 <sup>2</sup> Faculty of Life Science & Medicine, King's College London, London, UK

7 <sup>3</sup> Saigon University, Hochiminh City, Vietnam

8 \* Correspondence: V. T. Pham ([vuongt.pham@sg.edu.vn](mailto:vuongt.pham@sg.edu.vn))

9 <sup>‡</sup> These two authors contributed equally to this work.

10

11 **Abstract:** Interventional cardiology procedure is an important type of minimally invasive surgery  
12 that deals with the catheter-based treatment of cardiovascular diseases, such as coronary artery  
13 diseases, strokes, peripheral arterial diseases and aortic diseases. Ultrasound imaging, also called  
14 echocardiography, is a typical imaging tool that monitors catheter puncturing. Localising a medical  
15 device accurately during cardiac interventions can help improve the procedure's safety and  
16 reliability under ultrasound imaging. However, external device tracking and image-based tracking  
17 methods can only provide a partial solution. Thus, we proposed a hybrid framework, with the  
18 combination of both methods to localise the catheter tip target in an automatic way. The external  
19 device used was an electromagnetic tracking system from North Digital Inc (NDI) and the  
20 ultrasound image analysis was based on UNet, a deep learning network for semantic segmentation.  
21 From the external method, the tip's location was determined precisely, and the deep learning  
22 platform segmented the exact catheter tip automatically.

23 **Keywords:** cardiac intervention, echocardiography, electromagnetic (EM) tracking, deep learning,  
24 catheter localisation

## 25 1. Introduction

26 A cardiac interventional procedure, also known as an interventional cardiology procedure, is an  
27 important type of minimally invasive surgery that deals with catheter-based treatment of  
28 cardiovascular diseases, such as coronary artery diseases, strokes, peripheral arterial diseases and  
29 aortic diseases [1]. Generally, it can be classified into the following categories: cardiac catheterization,  
30 percutaneous coronary intervention, stents, embolic protection, percutaneous valve repair, balloon  
31 valvuloplasty and atherectomy. Catheter is the medical device used in most cardiac interventions  
32 that can be inserted into the body, which functionally allows for drainage, administration of fluids or  
33 gases, ablation and other tasks [2]. There are various types of catheters aiming at different medical  
34 applications, for example, the ablation catheter is specifically used for tissue ablation with the  
35 generated heat on the electrodes, the pacemaker catheter is to help heart pump, a central venous  
36 catheter is a conduit to give drugs positioned either in a vein near the heart or inside the atrium.

37 Image guidance during cardiac intervention is a key concept to guarantee patient safety while  
38 the direct line of sight is inhibited. X-ray imaging, traditionally, dominates the guidance during  
39 cardiovascular interventional procedures, but it provides limited views when the interventions  
40 involve the myocardium, pericardium and cardiac valves. Therefore, cardiac ultrasound  
41 (echocardiography) was introduced to navigate these challenges. Compared to cardiac X-ray imaging,  
42 echocardiography is especially useful for transcatheter puncture, percutaneous mitral valve  
43 procedures and left atrial appendage closure. Echocardiography fulfils the requirements by  
44 providing a real-time imaging solution, with both device and cardiac inner structure demonstration.  
45 NOTE: This preprint reports new research that has not been certified by peer review and should not be used to guide clinical practice.  
46 simultaneously [3]. There are three types of echocardiography that can be used during intervention:  
46 Transthoracic echocardiography (TTE), intracardiac echocardiography (ICE) and transoesophageal

47 echocardiography (TEE/TOE). TTE is widely available and portable. It is a non-invasive imaging  
48 procedure [4]. However, it possesses limited ability to visualise the back of the heart and is difficult  
49 to use during interventional procedures. ICE has also demonstrated great potential for in-vivo  
50 medical device monitoring, where a thin probe is inserted inside a patient, but this phased array  
51 probe is expensive and can only be used once. Additionally, ICE offers no standard views [5]. As a  
52 trade-off between the image quality and imaging cost obtained through an echocardiography, TOE  
53 imaging is commonly chosen during the catheter-based intervention. Prior to imaging, the patient  
54 lies in the left lateral decubitus position, and swallows the probe following the instruction during  
55 probe insertion. Mild to moderate sedation is induced in the patient to ease discomfort and to  
56 decrease the gag reflex by providing medications, such as midazolam. This makes the ultrasound  
57 probe pass easily into the oesophagus.

58 Currently, 2-D multiplane imaging is the most widely used mode of TOE, providing 20 standard  
59 trans-oesophageal echocardiographic views that can facilitate and provide consistency in training,  
60 reporting, archiving and quality assurance (as published by the American Society of  
61 Echocardiography (ASE) and the Society of Cardiovascular Anaesthesiologists (SCA)) [6]. In clinical  
62 practice, before localising and tracking the device from echocardiography, a specific standard view  
63 should be determined first. For instance, to view the general four chambers, the probe is positioned  
64 at the mid-oesophagus with a zero degree rotation. It is then placed at the same position with a 40  
65 degrees rotation. The aortic valve short-axis view can be obtained when the probe goes deeper into  
66 the stomach. The right ventricle and left ventricle views can be obtained at the same time from the  
67 transgastric apical short-axis view.

68 To ensure that the catheter tip is accurately localised during a safe interventional procedure  
69 when obtaining TOE imaging views, a reliable tracking solution is required. Currently, solutions, in  
70 general, can be categorized into two classes: the external tracking system and image-based method.  
71 The external tracking system needs to utilise an extra device to determine the catheter tip location;  
72 for example, the Bard Access product that employs the tip confirmation system (TCS) displays  
73 different electrocardiogram (ECG) signals, corresponding to different catheter locations [7]. However,  
74 surgeons require additional time and knowledge to analyse the external device and, occasionally,  
75 these external devices are largely affected by clinical environments. In comparison with external  
76 tracking methods, an image-based method is more distinct and easier to apply. Consequently, in  
77 recent years, the image-based method has attracted a lot of research attention. Previously, many  
78 image-based catheter tracking algorithms were performed on X-ray datasets instead of  
79 echocardiography datasets because X-ray images, electrodes or catheter tips possess distinct  
80 characteristic features that can be used for tracking and detection. At the same time, these features  
81 were vague in an ultrasound, which led to difficulties in localisation using only the image-based  
82 method. The classic image-based methods could only be applied on a small number of images. The  
83 methods utilised hand-crafted features. On the contrary, with deep learning, image tasks of greater  
84 difficulty can be achieved by end-to-end convolutional neural networks (CNN) [8]. Recently, the use  
85 of deep learning has been increasing rapidly in the medical imaging field, including computer-aided  
86 diagnosis (CAD), radiomics and medical image analysis [9].

87 However, the previous external tracking and image-based methods were two distinct  
88 localisation solutions to determine the catheter tip and no combination of these two methods was  
89 proposed with previous research studies.

90 The echocardiography images are collected on a 3D-printed, tissue-mimicking cardiac phantom  
91 [10] obtained from several standard TOE views with the Philips IE33 ultrasound machine [11]. Prior  
92 to ultrasound imaging, the catheter tip is first localised by the NDI EM tracking systems [12] using a  
93 pivot calibration [13] with an error less than 0.1 mm. Following data collection, all echocardiography  
94 images are processed with the Python 3 platform, using the UNet [14] automatic segmentation kernel.  
95 This hybrid localisation network can provide a reliable reference for new sonographers and doctors  
96 during catherization.

## 97 **2. Materials and Methods**

## 98 2.1. Echocardiography Image Collection for Catheter Localisation Model Training

99 To obtain the catheter tip information, at the same time, instead of using real patient data, the  
100 cardiac interventional procedure was simulated on a 3-D printed Lay-Fomm 40 phantom, which can  
101 fully resemble an adult patient heart. During imaging, the Philips S5-1 broadband sector array probe  
102 was placed on top of the cardiac phantom, while the phantom was fixed at the bottom of a plastic  
103 water tank. Subsequently, several TOE standard views were acquired by probe manipulation, such  
104 as the upper aortic valve view (commonly chosen in a real patient case). During the simulation, the  
105 Philips IE33 ultrasound machine was set to full volume mode with each image acquisition lasting for  
106 five seconds. All the DICOM images were then exported to blank CDs and analysed with ITK-SNAP  
107 [15].  
108

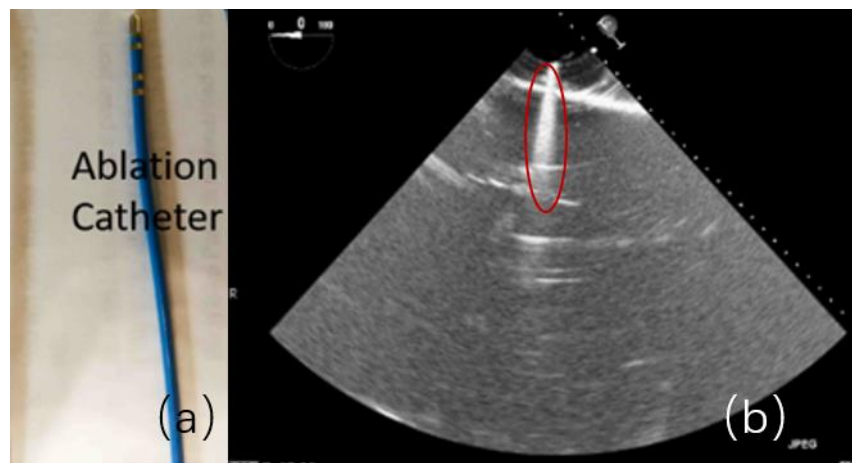

109  
110 **Figure 1.** (a) Shelley Medical Ablation Catheter. (b) Corresponding 2-D Ultrasound Image of (a).  
111

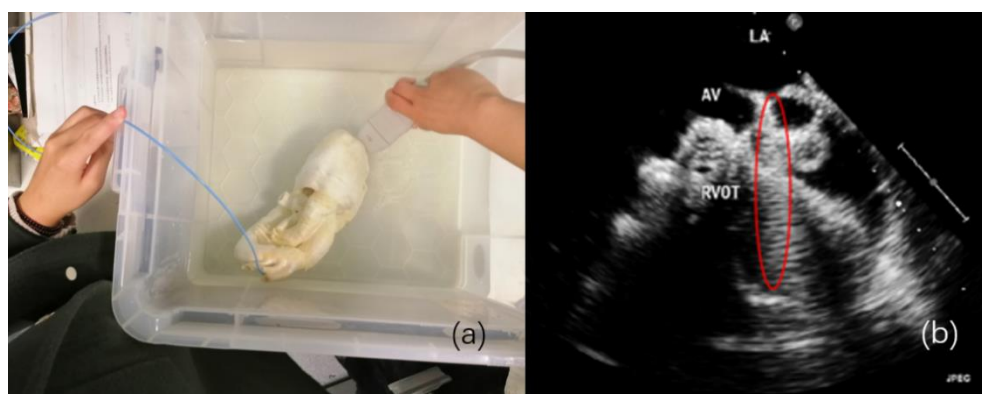

112  
113 **Figure 2.** Catheter Tip Movement. (a) 2-D Echocardiography Image Acquisition on 3-D Printed Cardiac  
114 Phantom. (b) Corresponding Ultrasound Results of (a) Under Aortic Valve Short-Axis View  
115

116 The corresponding ultrasound imaging results of the Shelley medical ablation catheter movements  
117 can be observed in Figure 1. While the horizontal line is the artefact, which will not be labelled in the  
118 following works. In Figure 2, we can observe from the echo image that the background contained both  
119 the ablation catheter and the cardiac structures. In the aortic valve, the visualisation of the catheter is  
120 not only affected by the valve structure but also affected by strong reverberations from the water tank.  
121 The low-image resolution also increases the difficulty to localise the catheter tip accurately.

## 122 2.2. Catheter Tip Determination via External EM Device & Pivot Calibration

123 Before applying the deep learning network in image-based methods for automatic catheter  
124 segmentation, it was necessary to determine the exact location of the tracked catheter tip in the trained  
125 ultrasound dataset to provide the groundtruth. As illustrated in Figures 1 and 2, it is usually difficult to  
126 identify the catheter tip in the image by visual inspection alone. Therefore, mapping the physical

127 location of the catheter tip to where it appears in the ultrasound imaging provided an alternative  
 128 approach to obtain a reliable groundtruth.  
 129

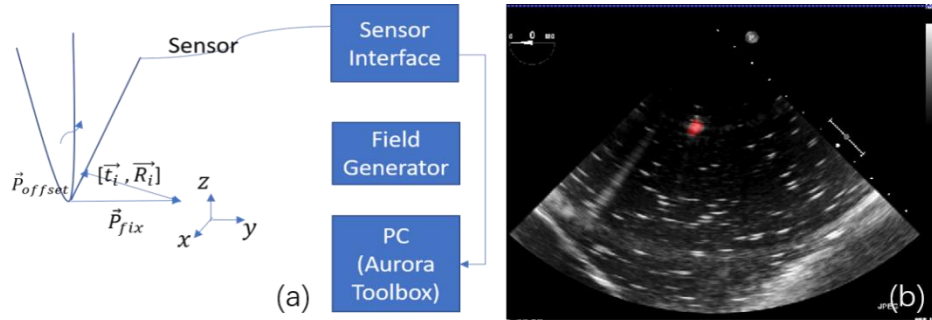

130  
 131 **Figure 3.** (a) Illustration of Pivot Calibration Using NDI Aurora EM Tracking System. (b) Mapped Location  
 132 of Catheter Tip in 2D Echocardiography.  
 133

134 In this section, the NDI Aurora EM tracking system [12] depicted in Figure 3 (a) was used to  
 135 arrive at the catheter tip's location physically because of its non-radiation and real-time 3-D tracking  
 136 ability. To simplify the setup, a 6-degree of freedom (DOF) catheter-type EM sensor from NDI was  
 137 used to represent the catheter, as it could generate a mapped point on a 2-D ultrasound image as  
 138 indicated in Figure 3 (b). The Shelley medical ablation catheter could not be directly connected to the  
 139 EM tracking device. It was tied to the sensor, so that the tracked tip location could be shared. The  
 140 physical location of the tip was calculated through a pivot calibration experiment. The use of external  
 141 EM tracking is to determine the length of catheter tip before training the lateral network, without EM  
 142 tracking, the catheter tip cannot be defined during groundtruth labelling.

143 During tracking, all the data was recorded by the EM tracking device, saved as a text file and  
 144 then processed further in MATLAB. Initially, the EM tracking device recorded the sensor's 3-D  
 145 location with the help of the tracking system coordinates. Through pivot calibration, the sensor was  
 146 manually moved around a fixed pivot point near the EM field generator. The corresponding location  
 147 matrix in the tracking system coordinates were transformed through formulas (1)–(5).  
 148

$$149 \quad (x, y, z) = \vec{t}_i, \quad (q_0, q_x, q_y) = \vec{R}_i \quad (1)$$

$$150 \quad \vec{R}_i \cdot \vec{P}_{offset} + \vec{t}_i = \vec{P}_{fix} \quad (2)$$

$$151 \quad \vec{R}_i \cdot \vec{P}_{offset} - \vec{P}_{fix} \cdot \vec{I} = -\vec{t}_i \quad (3)$$

$$152 \quad \begin{bmatrix} \vec{R}_1 & -\vec{I} \\ \vec{R}_2 & -\vec{I} \\ \vec{R}_N & -\vec{I} \end{bmatrix} \cdot \begin{bmatrix} \vec{P}_{offset} & \vec{P}_{fix} \end{bmatrix} = \begin{bmatrix} -\vec{t}_1 \\ -\vec{t}_2 \\ -\vec{t}_N \end{bmatrix} \quad (4)$$

$$153 \quad \begin{bmatrix} \vec{P}_{offset} & \vec{P}_{fix} \end{bmatrix} = pseudo\_inverse \begin{bmatrix} \vec{R}_1 & -\vec{I} \\ \vec{R}_2 & -\vec{I} \\ \vec{R}_N & -\vec{I} \end{bmatrix} * \begin{bmatrix} -\vec{t}_1 \\ -\vec{t}_2 \\ -\vec{t}_N \end{bmatrix} \quad (5)$$

154

### 155 2.3. Automatic Catheter Segmentation in 2-D Echocardiography through Deep Learning.

156 After determining the location of the ablation catheter tip physically, the state-of-the-art UNet  
 157 was utilized to train the deep-learning-based automatic segmentation platform on the collected  
 158 phantom echocardiography from different standard TOE views [16,17]. To make the trained model  
 159 more robust, another 19 real patient TOE folders were mixed and tested at the same time.

160 Currently, the state-of-the-art semantic segmentation model being employed is UNet [18-23],  
 161 which is depicted in Figure 4 [14]. This model can be used on smaller datasets, such as medical images  
 162 for faster training, while the deep learning models have to be trained on larger datasets with more  
 163 variations.  
 164

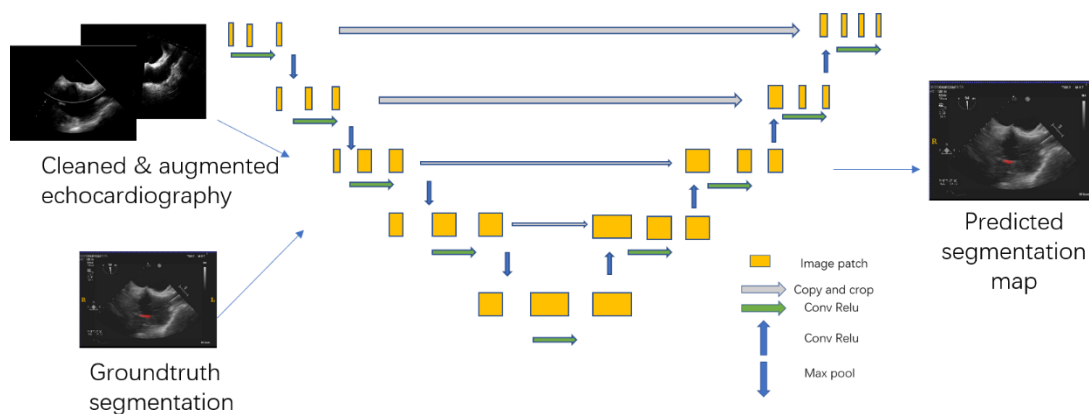

Figure 4. Diagram of Deep Learning Model Trained on 2-D Echocardiography Dataset.

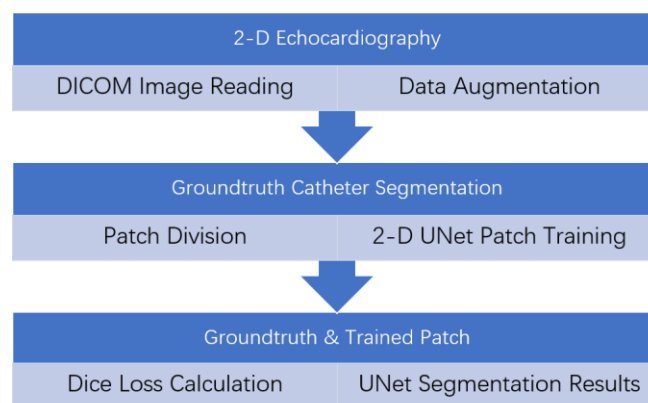

Figure 5. Flow chart of Echocardiography UNet Model Training Procedure.

The segmentation model was built on 2-D TOE images, collected from the Lay-Fomm 40 cardiac phantom, fabricated prior to obtaining both standard and non-standard views, with the ablation catheter moving from random places in the image. The image dataset contained 20 image volumes with 75 slices for each volume. The example provided in Figure 4 is a bicaval view with the catheter segmentation in the right atrium, and all of the groundtruth labels were obtained from the doctors' manual segmentation (under the reference of both EM tracking results and visual inspections). The segmentation algorithm is written in Python 3. As illustrated from Figure 5, the model training procedure is given.

The parameters used in the UNet segmentation model [24-32] were:

1. First ten volumes as the training dataset, second set of ten volumes as the validation dataset and testing on 14 random 2-D echocardiography volumes
2. Dropout at the last layer with the rate of 0.5
3. Augmenting the data offline to ten times as before
4. Use early stopping with patience of 6000 iterations
5. Positive and negative rate of 0.95 (when the image slice contained the segmentation target, we regarded it as a positive slice)
6. Patch size of 1,448,448
7. Batch size of four
8. Total number of iterations (batch size) were 30000
9. Iterative UNet depth of five
10. Loss function: Dice loss and Laplace smoothing for preventing overfitting
- 11: Activation function as ReLU

196 To better describe the performance by automatic segmentation when compared to groundtruth  
197 labelling, we introduced a Dice loss to evaluate how accurate the prediction would be (calculated  
198 through equation [37])

$$199 \quad \text{Dice loss} = 1 - \frac{2|X \cap Y|}{|X| + |Y|} = \frac{2TP}{2TP + FP + FN} = 1 - \text{Dice accuracy} \quad (6)$$

### 200 3. Results and Discussion

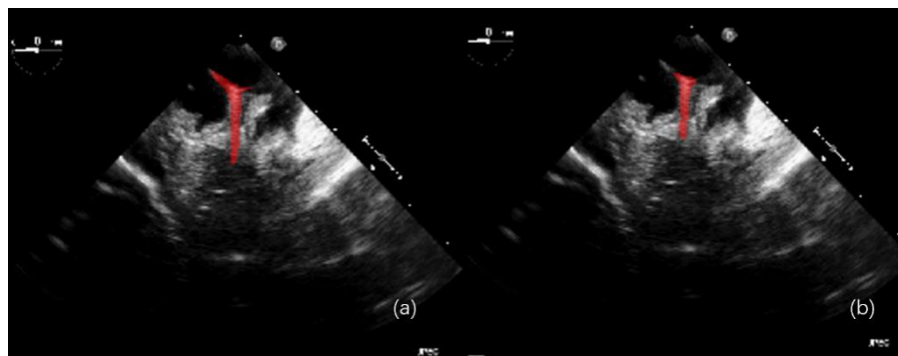

201  
202 **Figure 6.** (a) Groundtruth segmentation of Shelley medical ablation catheter. (b) Deep learning platform  
203 predicted catheter segmentation on simulated 2-D echocardiography.  
204

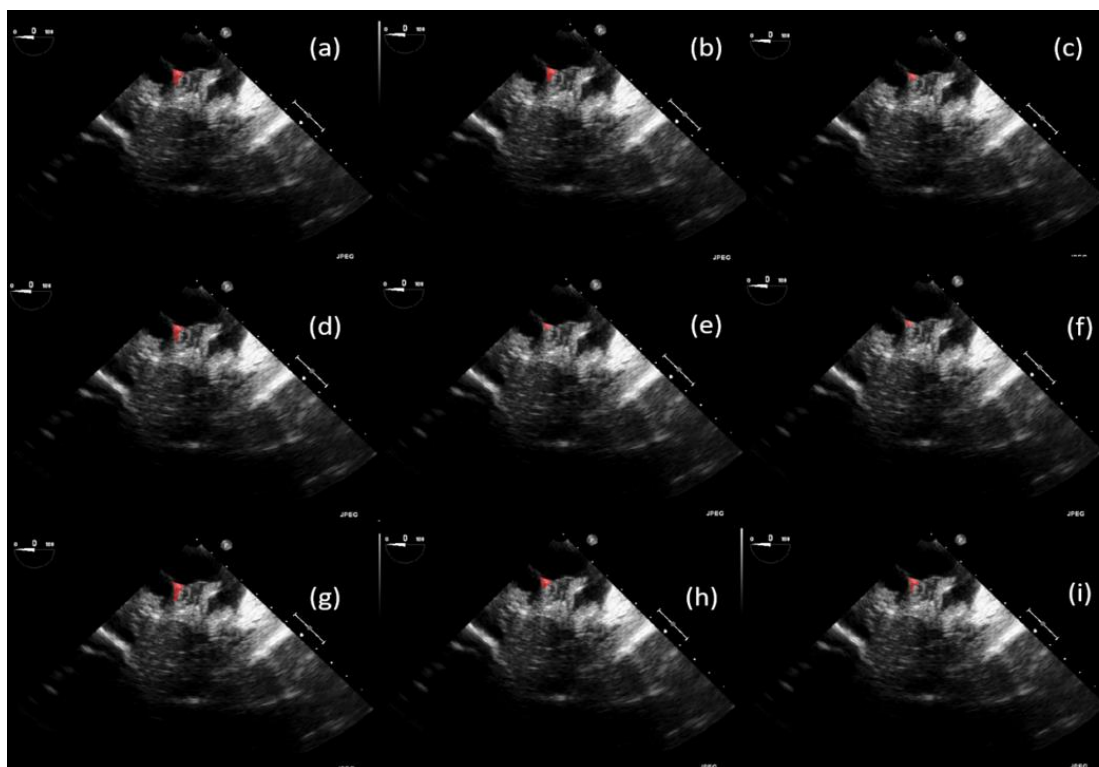

205  
206 **Figure 7.** Catheter Tip Segmentation Results by Deep Learning Platform in 2-D Echocardiography  
207 Sequences (a) 0.1s (b) 0.2s (c) 0.3s (d) 0.4s (e) 0.5s (f) 0.6s (g) 0.7s (h) 0.8s (i) 1s  
208

209 The physical localisation result of the targeted ablation catheter was  $4.7362 \pm 0.3523$  mm, and  
210 the corresponding catheter's groundtruth segmentation is indicated in Figure 6 (a). Figure 6 (b)  
211 indicates the corresponding prediction results of Figure 6 (a), trained by the deep learning platform.  
212 The original 2-D echocardiography of Figure 6 is the simulated result collected on the 3-D printed  
213 cardiac phantom. With the proposed hybrid framework, the accuracy of the catheter tip's  
214 groundtruth location can be guaranteed to 0.1mm. When compared to the traditional groundtruth by  
215 considering a doctor's visual inspection alone, this new groundtruth is more reliable. During the  
216 catheter movement, the final trained model could still identify the dynamic target as indicated in

217 Figure 7. Within one second, no catheter tip was missing in every single frame, but at the same time,  
218 as the current deep learning network has limited ability in recognizing moving target, in figure 7,  
219 some predicted segmentations are incomplete compared to the groundtruth. The corresponding Dice  
220 accuracy results are as follows:

221

|                           |                           |                     |
|---------------------------|---------------------------|---------------------|
| 0.8138811737712837 (max), | 0.6771465049473349,       | 0.8079201691686618, |
| 0.7211444100551068,       | 0.7322477650063857,       | 0.7824308664136881, |
| 0.8112021032810474,       | 0.6286978766145106 (min), | 0.7643511925952297  |

223

224 The training and testing of the Dice loss plots, indicated in Figure 8, are consistent with the  
225 aforementioned accuracy results. The Dice loss on training dataset was rather low. However, on the  
226 validation dataset, the Dice loss rose significantly (which indicated that the trained model was  
227 overfitting to a certain extent). Therefore, the accuracy obtained cannot compete with the  
228 performance on CT or MRI volumes. Except for the difficulty faced (due to the target being sparse or  
229 ambiguous), another challenge attributed to the limited variation of TOE images obtained, caused  
230 the overfitting of the model, which was unavoidable.

231

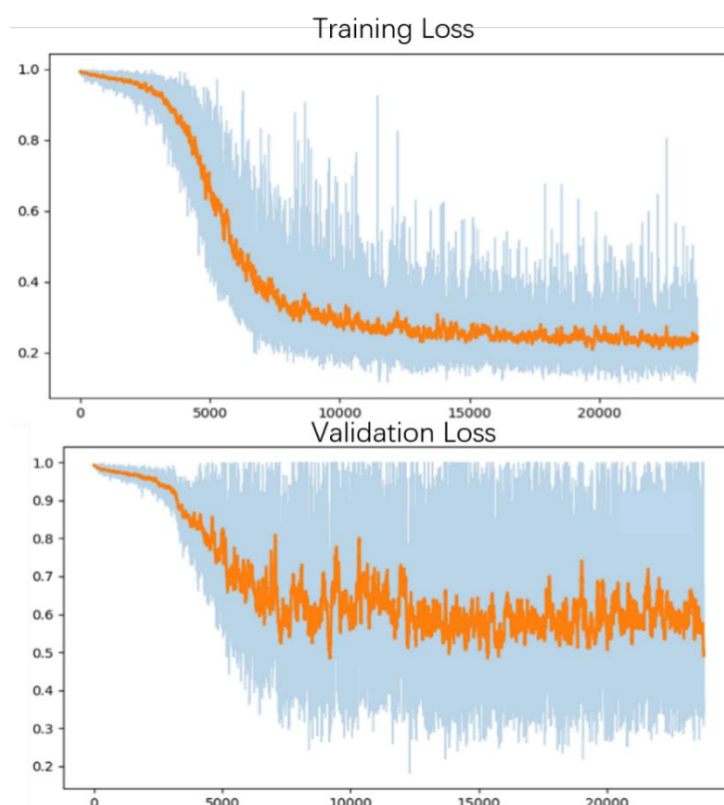

232

233

**Figure 8.** Training curve of the deep learning model's training and validation loss.

234

235 To validate the trained model's ability for generalisation, the model was also tested with real  
236 patient data obtained from several standard TOE views, such as the mid-oesophagus right ventricle  
237 (ME-RV) inflow view and the transgastric basal short-axis (TG basal SAX) view. From Figure 9, the  
238 predicted results proved the generalisation ability of the proposed model with correct catheter  
239 location and shape. As the target was too blurred, the shape may have varied from the groundtruth  
240 to a certain level.

241

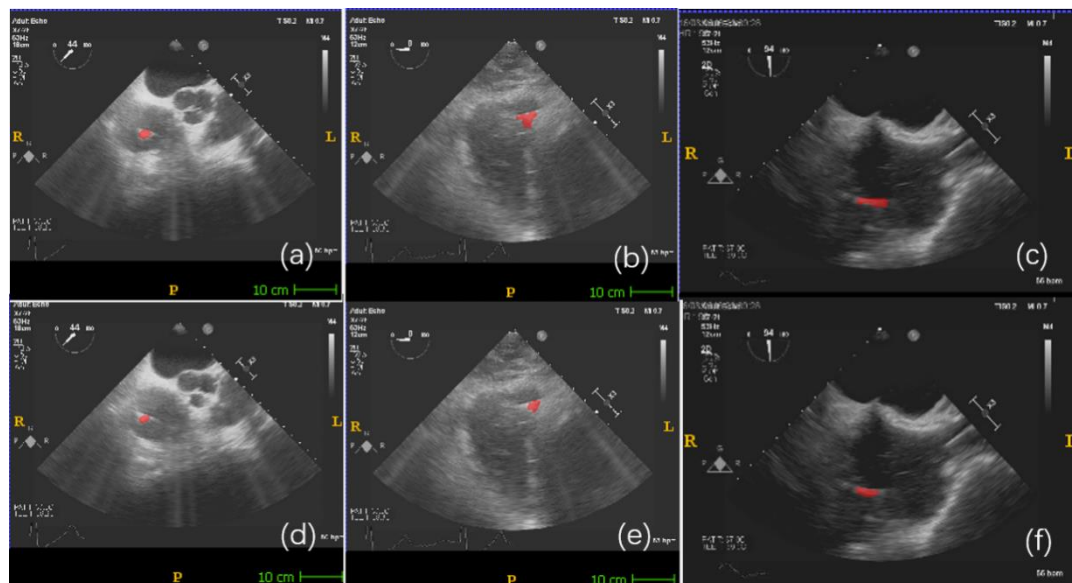

**Figure 9.** Validation of the model on real patient echocardiography (a)–(c): groundtruth segmentation from ME-RV inflow, TG Basal SAX and bicausal view. (d)–(f): deep learning predicted segmentation of (a)–(c)

242  
243  
244  
245

#### 246 4. Conclusions

247 EM tracking device is easily get affected by the clinical environment, and it cannot provide the  
248 visual information of the medical device; while the target in medical images cannot provide the  
249 numerical results. This new hybrid localisation framework combines the advantages of external EM  
250 tracking and deep-learning-based image methods, and successfully builds up the connection  
251 between the physical coordinate and the image coordinates, which offers a new solution for obtaining  
252 a more reliable groundtruth to train the automatic deep learning model. At the same time, 3-D printed  
253 phantoms also provide a new direction for collecting the original dataset to train the deep learning  
254 models based on our requirements.

255 Based on the simulated dataset and EM tracking tip determinations, the reliability of deep-  
256 learning-based models can be guaranteed. However, the model's accuracy and stability need to be  
257 improved in the future. During the future improvement, the groundtruth labels have to be derived  
258 from the EM sensor, while all the possible standard views need to be classified too. Due to the dataset  
259 limitations, all the networks built thus far faced the overfitting problem, so an adequate fully  
260 automatic solution for cardiac intervention has not yet been achieved.

261

262 **Data Availability:** The dataset can be accessed upon request.

263 **Funding:** This research received funding from the Chinese Scholarship Council and the Beijing Chuangxinhuizhi  
264 Co Ltd.

265 **Acknowledgments:** We would like to express our gratitude for the financial support provided by the Chinese  
266 Scholarship Council and the Beijing Chuangxinhuizhi Co Ltd. We would also like to express our gratitude for  
267 the precious help provided by King's College London.

268 **Conflicts of Interest:** The authors declare no conflict of interest.

269 **Disclosure:** An earlier version of this paper has been presented as preprint according to the following link:  
270 <https://www.medrxiv.org/content/10.1101/2020.12.22.20248705v2.full.pdf> [32].

271 **Authors' Contributions:** Fei Jia and Shu Wang designed the overall research scheme, programmed and  
272 debugged the algorithm, and wrote the paper. V. T. Pham made contribution in funding acquisition and  
273 proofreading.

274



## 275 References

- 276 1. Xianliang Wu. Fast Catheter segmentation and tracking based on X-ray fluoroscopic and  
277 echocardiographic modalities for catheter-based cardiac minimally invasive interventions. PhD Thesis.  
278 Imperial College London, London, 2014.
- 279 2. Diggery, Robert. Catheters: Types, applications and potential complications medical devices and  
280 equipment. Nova Science. New York, USA, 2012. ISBN 978-1621006305. pp: 1.
- 281 3. Nina Wunderlich, et. al. 3D Echo Guidance for Structural Heart Interventions. *Interventional*  
282 *Cardiology* 2009;4(1). pp:16-20. doi: 10.15420/icr.2009.4.1.16
- 283 4. Frank E. Silvestry. et.al. ASE Recommendations for Clinical Practice: Echocardiography-Guided  
284 Interventions. *Journal of the American Society of Echocardiography* 2009, Volume 22, Number 3. pp: 213-  
285 231. doi: 10.1016/j.echo.2008.12.013
- 286 5. Jongbloed MRM, SchaliJ MJ, Zeppenfeld K, et al. Clinical applications of intracardiac  
287 echocardiography in interventional procedures. *Heart (British Cardiac Society)* 2005; 91(7):981-90.  
288 doi: 10.1136/hrt.2004.050443
- 289 6. Shanewise JS, Cheung AT, Aronson S, et al. ASE/SCA guidelines for performing a comprehensive  
290 intraoperative multiplane transesophageal echocardiography examination. *Anesthesia & Analgesia*,  
291 1999, 89(4): p. 870-84. doi: 10.1097/0000539-199910000-00010
- 292 7. A. J. Johnston; Et.al. Evaluation of the Sherlock 3CG Tip Confirmation System on peripherally inserted  
293 central catheter malposition rates. *Anaesthesia* 2014, 69, 1322–1330. doi:10.1111/anae.12785
- 294 8. B. Zhou, A. Khosla, A. Lapedriza, A. Oliva and A. Torralba, "Learning Deep Features for  
295 Discriminative Localization," *2016 IEEE Conference on Computer Vision and Pattern Recognition (CVPR)*,  
296 Las Vegas, NV, 2016, pp. 2921-2929, doi: 10.1109/CVPR.2016.319.
- 297 9. Kenji Suzuki. Overview of deep learning in medical imaging. *Radiol Phys Technol* 2017. 10(3):257-273.  
298 doi: 10.1007/s12194-017-0406-5.
- 299 10. Shu Wang. Development and Testing of an Ultrasound-Compatible Cardiac Phantom for  
300 Interventional Procedure Simulation Using Direct Three-Dimensional Printing. *3D Printing and*  
301 *Additive Manufacturing Ahead of Print* 2020. doi: 10.1089/3dp.2019.0097.
- 302 11. Philips iE33 Ultrasound System - Avante Health Solutions. Available online:  
303 <https://avantehs.com/p/philips-ie33-ultrasound-system/12681> (accessed on 02 11 2020)
- 304 12. Christopher Nafis; et.al. Method for estimating dynamic EM tracking accuracy of surgical navigation  
305 tools. Proc. SPIE 6141, *Medical Imaging 2006: Visualization, Image-Guided Procedures, and Display*, 61410K  
306 (10 March 2006); doi: 10.1117/12.653448.
- 307 13. Ziv Yaniv. Which Pivot Calibration? Proceedings of SPIE Vol. 941527, (2015). doi: [10.1117/12.2081348](https://doi.org/10.1117/12.2081348)
- 308 14. Ronneberger, O., Fischer, P., & Brox, T. (2015). U-Net: Convolutional Networks for Biomedical Image  
309 Segmentation. *Medical Image Computing and Computer-Assisted Intervention – MICCAI* 2015.  
310 Lecture Notes in Computer Science, vol 9351. Springer, Cham. doi: 10.1007/978-3-319-24574-4\_28
- 311 15. Paul A. Yushkevich, Joseph Piven, Heather Cody Hazlett, Rachel Gimpel Smith, Sean Ho, James C.  
312 Gee, and Guido Gerig. User-guided 3D active contour segmentation of anatomical structures:  
313 Significantly improved efficiency and reliability. *Neuroimage* 2006 Jul 1; 31(3): 1116-28.  
314 doi: 10.1016/j.neuroimage.2006.01.015.
- 315 16. Virtual TEE: Standard Views, Cardiac, Transesophageal Echocardiography, 3D Heart Model,  
316 Education. Available online:  
317 [http://pie.med.utoronto.ca/TEE/TEE\\_content/TEE\\_standardViews\\_intro.html](http://pie.med.utoronto.ca/TEE/TEE_content/TEE_standardViews_intro.html) (accessed on 04 11 2020)
- 318 17. Shelhamer, E., Long, J., & Darrell, T. Fully Convolutional Networks for Semantic Segmentation.  
319 *IEEE Transactions on Pattern Analysis and Machine Intelligence*, 2017, vol. 39, pp 640-651. doi: 10.1109/  
320 TPAMI.2016.2572683
- 321 18. Yin, Xiao-Xia; Sun, Le; Fu, Yuhan; Lu, Ruiliang; Zhang, Yanchun. U-Net-Based Medical Image  
322 Segmentation. *Journal of Healthcare Engineering*, v 2022, 2022
- 323 19. Li, Lian-Hui; Hang, Jiu-Cheng; Gao, Yang; Mu, Chun-Yang. Using an Integrated Group Decision  
324 Method Based on SVM, TFN-RS-AHP, and TOPSIS-CD for Cloud Service Supplier  
325 Selection. *Mathematical Problems in Engineering*, v 2017, 2017, DOI: 10.1155/2017/3143502
- 326 20. Li, LH; Hang, JC ; Sun, HX ; Wang, L. A conjunctive multiple-criteria decision-making approach for  
327 cloud service supplier selection of manufacturing enterprise. *ADVANCES IN MECHANICAL*  
328 *ENGINEERING*, vol. 9, iissue 3, 1687814016686264, DOI10.1177/1687814016686264

- 329 21. Liu, Lianshan; Meng, Lingzhuang; Zheng, Weimin; Peng, Yanjun; Wang, Xiaoli. A Novel High-  
330 Capacity Information Hiding Scheme Based on Improved U-Net. *Security and Communication*  
331 *Networks*, v 2022, 2022
- 332 22. Lin, Yih-Lon; Huang, Adam; Yang, Chung-Yi; Chang, Wen-Yu. Measurement of Body Surface Area for  
333 Psoriasis Using U-net Models. *Computational and Mathematical Methods in Medicine*, v 2022, 2022
- 334 23. L. Li and C. Mao, "Big Data Supported PSS Evaluation Decision in Service-Oriented Manufacturing,"  
335 in *IEEE Access*, vol. 8, pp. 154663-154670, 2020, doi: 10.1109/ACCESS.2020.3018667.
- 336 24. Li L , Mao C , Sun H , et al. Digital Twin Driven Green Performance Evaluation Methodology of  
337 Intelligent Manufacturing: Hybrid Model Based on Fuzzy Rough-Sets AHP, Multistage Weight  
338 Synthesis, and PROMETHEE II. *Complexity*, 2020, 2020(6):1-24.
- 339 25. Liu, Zhixin; Su, Boning; Lv, Fang. Intelligent Identification Method of Crop Species Using Improved  
340 U-Net Network in UAV Remote Sensing Image. *Scientific Programming*, v 2022, 2022
- 341 26. Kwon, Hyun; Jeong, Jongwook. AdvU-Net: Generating Adversarial Example Based on Medical Image  
342 and Targeting U-Net Model. *Journal of Sensors*, v 2022, 2022
- 343 27. Dou, Chunpeng; Li, Kuiwu; Wang, Liang . Computed Tomography Image Segmentation of the  
344 Proximal Colon by U-Net for the Clinical Study of Somatostatin Combined with Intestinal Obstruction  
345 Catheter. *Computational and Mathematical Methods in Medicine*, v 2022, 2022
- 346 28. L. Li, T. Qu, Y. Liu, et al., "Sustainability Assessment of Intelligent Manufacturing Supported by Digital  
347 Twin," in *IEEE Access*, vol. 8, pp. 174988-175008, 2020, doi: 10.1109/ACCESS.2020.3026541.
- 348 29. Sun, Ruixue ; Chang, Ruiting; Yu, Tianshu; Wang, Dongxin; Jiang, Lijie . U-Net Modelling-Based  
349 Imaging MAP Score for T1 Stage Nephrectomy: An Exploratory Study. *Journal of Healthcare*  
350 *Engineering*, v 2022, 2022
- 351 30. Li L, Lei B, Mao C. Digital Twin in Smart Manufacturing. *Journal of Industrial Information Integration*.  
352 January 2022, 26(9):100289, DOI: 10.1016/j.jii.2021.100289
- 353 31. Wang, Yao ; Kong, Jiayuan; Zhang, Hesheng . U-Net: A Smart Application with Multidimensional  
354 Attention Network for Remote Sensing Images. *Scientific Programming*, v 2022, 2022
- 355 32. A Hybrid Catheter Localisation Framework in Echocardiography Based on Electromagnetic Tracking  
356 and Deep Learning Segmentation. 2022,  
357 <https://www.medrxiv.org/content/10.1101/2020.12.22.20248705v2.full.pdf>
